# Supplementary material for: In Silico Investigation of Potential Applications of Gamma Carbonic Anhydrases as Catalysts of CO2 Biomineralization Processes: A Visit to the Thermophilic Bacteria Persephonella hydrogeniphila, Persephonella marina, Thermosulfidibacter takaii, and Thermus thermophilus
Source: PubMed Central journal article supplement (PMC8000050; doi:10.3390/ijms22062861), 2021-03-11
Supplement: ijms-22-02861-s001.pdf [file ijms-22-02861-s001.pdf]

**Supplementary data:** *In silico* investigation of potential applications of gamma carbonic anhydrases as catalysts of CO<sub>2</sub> biomineralization processes: A visit to the thermophilic bacteria *Persephonella hydrogeniphila*, *Persephonella marina*, *Thermosulfidibacter takaii* and *Thermus thermophilus*

**Colleen Varaidzo Manyumwa<sup>1</sup> and Özlem Tastan Bishop<sup>1\*</sup>**

<sup>1</sup> Research Unit in Bioinformatics (RUBi), Department of Biochemistry and Microbiology, Rhodes University, Makhanda, 6140, South Africa; colleen.manyumwa06@gmail.com; O.TastanBishop@ru.ac.za

\*Correspondence: O.TastanBishop@ru.ac.za; Tel: +27-46-603-8072; Fax: +27-46-603-7576



Table S2: Interface characteristics of the trimeric structures of  $\gamma$ -CAs.

| Carbonic anhydrase | Hydrogen bonds |     | Salt bridges |     | Buried surface area/ $\text{\AA}^2$ | Total surface area/ $\text{\AA}^2$ | % BSA |
|--------------------|----------------|-----|--------------|-----|-------------------------------------|------------------------------------|-------|
|                    | PDBePISA       | PIC | PDBePISA     | PIC |                                     |                                    |       |
| $\gamma$ -PhCA     | 18             | 40  | 10           | 5   | 5,155                               | 24,780                             | 20.9  |
| $\gamma$ -PmCA     | 12             | 38  | 8            | 6   | 5,353                               | 25,327                             | 21.1  |
| $\gamma$ -TtCA     | 41             | 60  | 26           | 9   | 6,846                               | 23,823                             | 28.7  |
| $\gamma$ -TtkCA    | 15             | 44  | 9            | 5   | 4,749                               | 23,574                             | 20.1  |
